# Supplementary material for: Morphologically controllable synthesis of core–shell structured Au@Cu2O with enhanced photocatalytic activity
Source: Royal Society of Chemistry journal article supplement (doi:10.1039/c5ra10845d), 2015-01-01
Supplement: c5ra10845d1.pdf [file c5ra10845d1.pdf]

## Supporting Information

### **Morphologically controllable synthesis of core-shell structured Au@Cu<sub>2</sub>O with enhanced photocatalytic activity**

Guotao Yuan<sup>a</sup>, Mengna Lu<sup>a</sup>, Jiuhui Fei<sup>a</sup>, Jun Guo<sup>a</sup>, Zuoshan Wang<sup>a\*</sup>

<sup>a</sup> College of Chemistry, Chemical Engineering and Materials Science, Soochow University,  
Soochow, 215123, China

\* Corresponding author: No.199, Ren'ai Road, Suzhou Industry Park, Suzhou 215123, China. Tel.:  
+086-0512- 85187680; fax: +086-0512-85187680 (Z. S. Wang). E-mail address:  
[zuoshanwang@suda.edu.cn](mailto:zuoshanwang@suda.edu.cn).

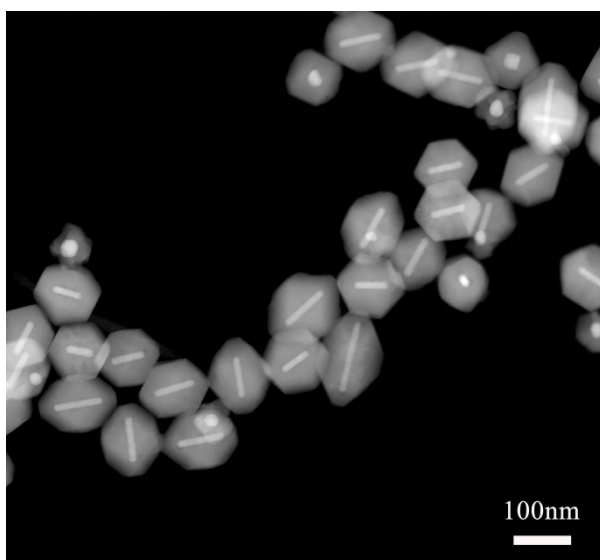

**Figure S1** STEM image of OCT-Au@Cu<sub>2</sub>O

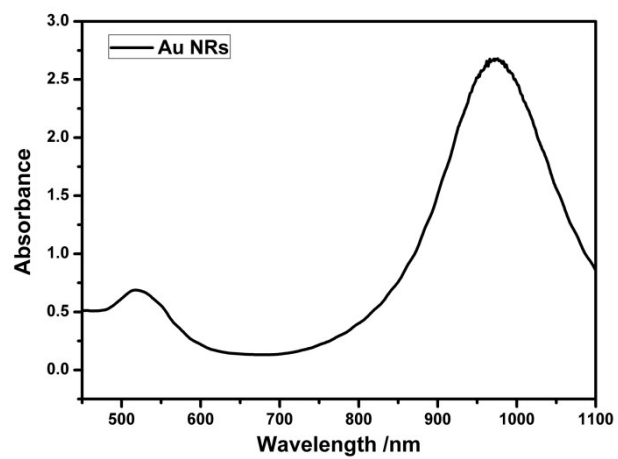

**Figure S2** UV-vis absorption spectrum of Au NRs
